# Supplementary material
Source: Springer Nature journal article supplement (https://www.springermedizin.de/resource/supplementary/12936_2013_2782_MOESM3_ESM.pdf/9544254)

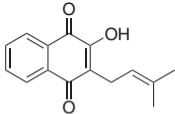

Lapichol

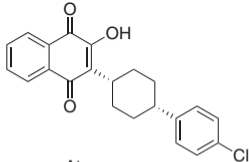

Atovaquone

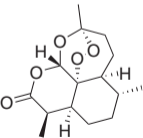

Artemisinin

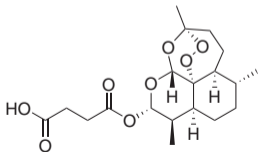

Artesunate

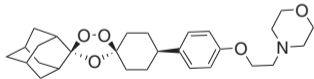

OZ439

Supplement: MOESM3 [file 9544254]
